# Supplementary material for: Hierarchical ZnCoS@CoFe-layered double hydroxide on Ni foam to enhance the OER performance for water splitting
Source: Royal Society of Chemistry journal article supplement (doi:10.1039/d4nj03986f), 2024-01-01
Supplement: d4nj03986f1.pdf [file d4nj03986f1.pdf]

## Supplementary Material:

### Hierarchical ZnCoS@CoFe-layered double hydroxide on Ni foam to enhance the OER performance for water splitting

Tianyun Li<sup>1</sup>, Zhongxiao Chen<sup>1</sup>, Chunping Dong<sup>2</sup>, Dan Wang<sup>1</sup>, Wenchang Wang<sup>1</sup>,  
Xueling Shan<sup>1\*</sup>, Zhidong Chen<sup>1\*</sup>

<sup>1</sup>Jiangsu Key Laboratory of Advanced Catalytic Materials and Technology, School of Petrochemical Engineering, Changzhou University, Changzhou, Jiangsu 213164, PR China

<sup>2</sup>School of Pharmacy, Changzhou University, Changzhou 213164, China

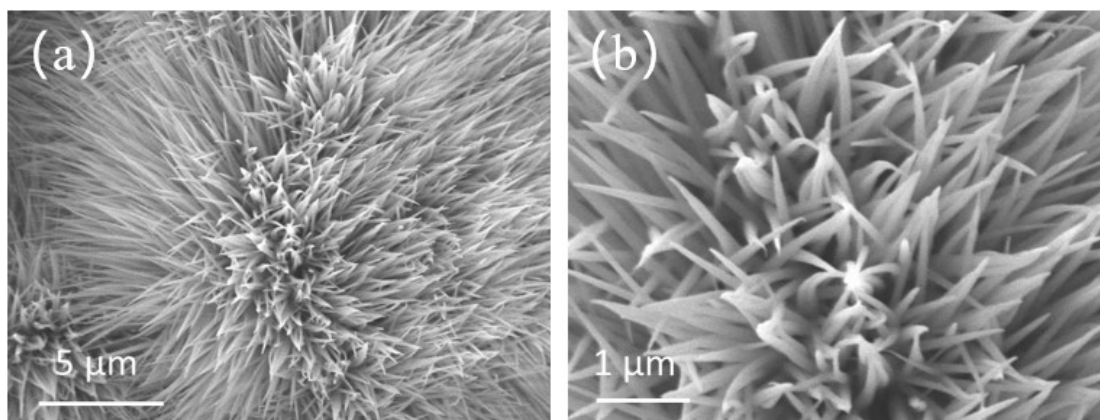

Figure S1. (a and b) SEM images of ZnCo-LDH/NF at low and high magnification.

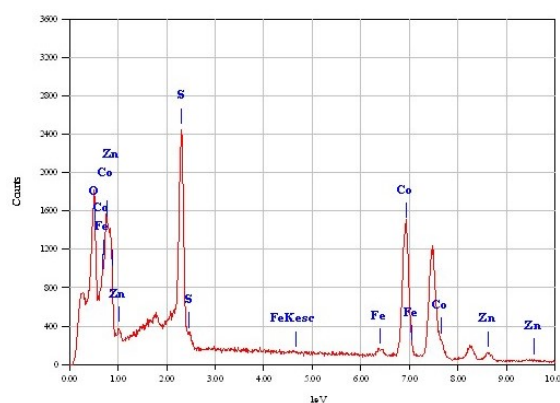

Figure S2. EDX pattern of ZnCoS@CoFe-LDH

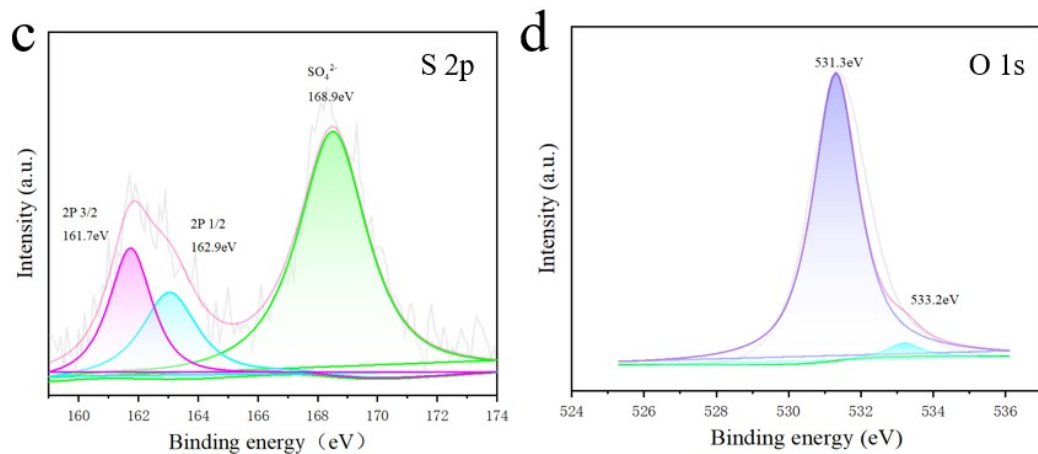

Figure S3. XPS survey spectra, high resolution (c) S 2p spectra and, (d) O 1s spectra of ZnCoS@CoFe-LDH.

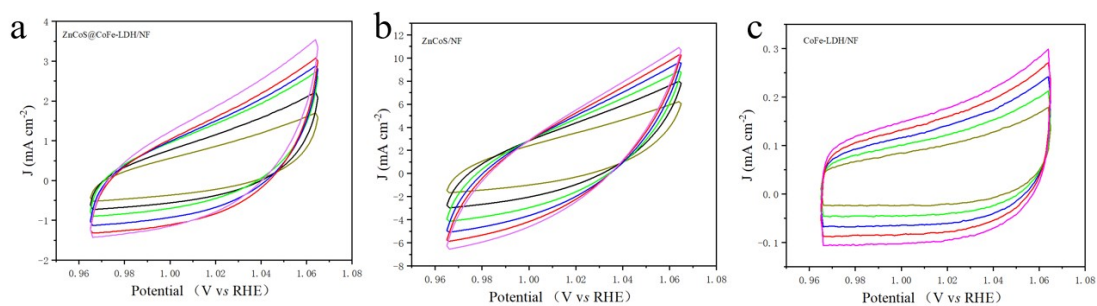

Figure S4. CV curves of (a) ZnCoS@CoFe-LDH/NF, (b) ZnCoS/NF, (c) CoFe-LDH/NF in the region of 0.96 ~ 1.07 V vs. RHE in 1.0 M KOH at various scan rates.

Table S1. EDX data of ZnCoS@CoFe-LDH

| Element | (keV) | Mass % | Error | At %  |
|---------|-------|--------|-------|-------|
| O K     | 0.525 | 6.63   | 0.18  | 19.13 |
| S K     | 2.307 | 13.05  | 0.19  | 18.78 |
| Fe K    | 6.398 | 2.56   | 1.07  | 2.12  |
| Co K    | 6.924 | 66.32  | 1.43  | 51.91 |
| Zn K    | 8.630 | 11.43  | 3.88  | 0.07  |
| Total   |       | 100    |       | 100   |

Table S2. Comparison of OER performance with that of recently reported electrocatalysts in 1.0 KOH.

| Catalyst                                              | Electrolyte | $e \eta(\text{mV})@j$ (mA $\text{cm}^{-2}$ ) | Tafel slope (mV $\text{dec}^{-1}$ ) | Ref.      |
|-------------------------------------------------------|-------------|----------------------------------------------|-------------------------------------|-----------|
| ZnCoS@CoFeLDH                                         | 1 M KOH     | 160@10                                       | 43.35                               | This work |
| NiSe@CoFe LDH                                         | 1 M KOH     | 203@10                                       | 90.3                                | 1         |
| Co (OH) <sub>2</sub> /Fe <sub>7</sub> Se <sub>8</sub> | 1 M KOH     | 278@10                                       | 64                                  | 2         |
| Mo-Ni <sub>3</sub> S <sub>4</sub> /CW                 | 1 M KOH     | 240@10                                       | 47.7                                | 3         |
| Ni (OH) <sub>2</sub> /MoS <sub>2</sub>                | 1 M KOH     | 328@10                                       | 69.3                                | 4         |
| NiFeVS <sub>x</sub> @NF                               | 1 M KOH     | 259@10                                       | 34                                  | 5         |
| 3D Ni <sub>3</sub> S <sub>2</sub> /NF                 | 1 M KOH     | 242@10                                       | 74                                  | 6         |
| ZnCo <sub>2</sub> O <sub>4</sub> @ZnCo-LDHs           | 1 M KOH     | 375@10                                       | 73                                  | 7         |
| CoP/Co (OH) <sub>2</sub> @NF                          | 1 M KOH     | 266@10                                       | 95.87                               | 8         |
| CeO <sub>2</sub> /Co-Mn-S/NF                          | 1 M KOH     | 239@10                                       | 93.2                                | 9         |

## References

- 1.F. Nie, Z. Li, X. Dai, X. Yin, Y. Gan, Z. Yang, B. Wu, Z. Ren, Y. Cao and W. Song, *Chem. Eng. J.*, 2022, **431**, 21134080.
- 2.C. Gong, L. Zhao, D. Li, X. He, H. Chen, X. Du, D. Wang, W. Fang, X. Zeng and W. Li, *Chem. Eng. J.*, 2023, **466**, 2306786.
- 3.Z. Shi, C. Mao, L. Zhong, J. Peng, M. Liu, H. Li and J. Huang, *Appl. Catal. B- Environ. Energy.*, 2023, **339**, 23123123.
- 4.K. T. Le, N. N. T. Pham, Y.-S. Liao, A. Ranjan, H.-Y. Lin, P.-H. Chen, H. Nguyen, M. Y. Lu, S. G. Lee and J. M. Wu, *J. Mater. Chem. A.*, 2023, **11**, 3481-3492.
- 5.Y. He, J. Shen, Q. Li, X. Zheng, Z. Wang, L. Cui, J. Xu and J. Liu, *Chem. Eng. J.*, 2023, **474**, 23145461.
- 6.J. Zhang, Y. Li, T. Zhu, Y. Wang, J. Cui, J. Wu, H. Xu, X. Shu, Y. Qin, H. Zheng, P. M. Ajayan, Y. Zhang and Y. Wu, *Acs. Appl. Mater. Interfaces.*, 2018, **10**, 31330-31339.
- 7.J. Pan, F. Wang, L. Zhang, S. Song and H. Zhang, *Inorg. Chem. Front.*, 2019, **6**, 220-225.
- 8.Y. Chu, D. Wang, J. Wang, S. Zha, M. Wu, C. Liu, W. Wang, N. Mitsuzaki and Z. Chen, *Inorg. Chem. Front*, 2023, **62**, 18189-18197.
- 9.F. Xiao, P. Zhou, R. Weng, P. Yang, W. Tang, L. Liao, Y. Wang, M. Zhao, W. Zhang, P. He and B. Jia, *J. Alloy. Compd.*, 2022, **901**, 22163621.
